# Supplementary material for: White hyperelectrofluorescence from solution-processable OLEDs based on phenothiazine substituted tetraphenylethylene derivatives
Source: Royal Society of Chemistry journal article supplement (doi:10.1039/d0tc03136d), 2020-01-01
Supplement: d0tc03136d1.pdf [file d0tc03136d1.pdf]

## Supporting Information

|                                                                            |                         |
|----------------------------------------------------------------------------|-------------------------|
| <b>1. Experimental details .....</b>                                       | <b>S2-S5</b>            |
| <b>2. Solvatochromism .....</b>                                            | <b>S5, S6</b>           |
| <b>3. PXRD .....</b>                                                       | <b>S6</b>               |
| <b>4. Single crystal XRD analysis .....</b>                                | <b>S8,S9</b>            |
| <b>5. DFT and TD-DFT calculations .....</b>                                | <b>S10,S11, S20-S26</b> |
| <b>6. <sup>1</sup>H-NMR, <sup>13</sup>C-NMR and HRMS of PTZTPE-2 .....</b> | <b>S12,S13</b>          |
| <b>7. <sup>1</sup>H-NMR, <sup>13</sup>C-NMR and HRMS of PTZTPE-3 .....</b> | <b>S14, S15</b>         |
| <b>8. Device processing methods and properties .....</b>                   | <b>S16-S20</b>          |

## Experimental details

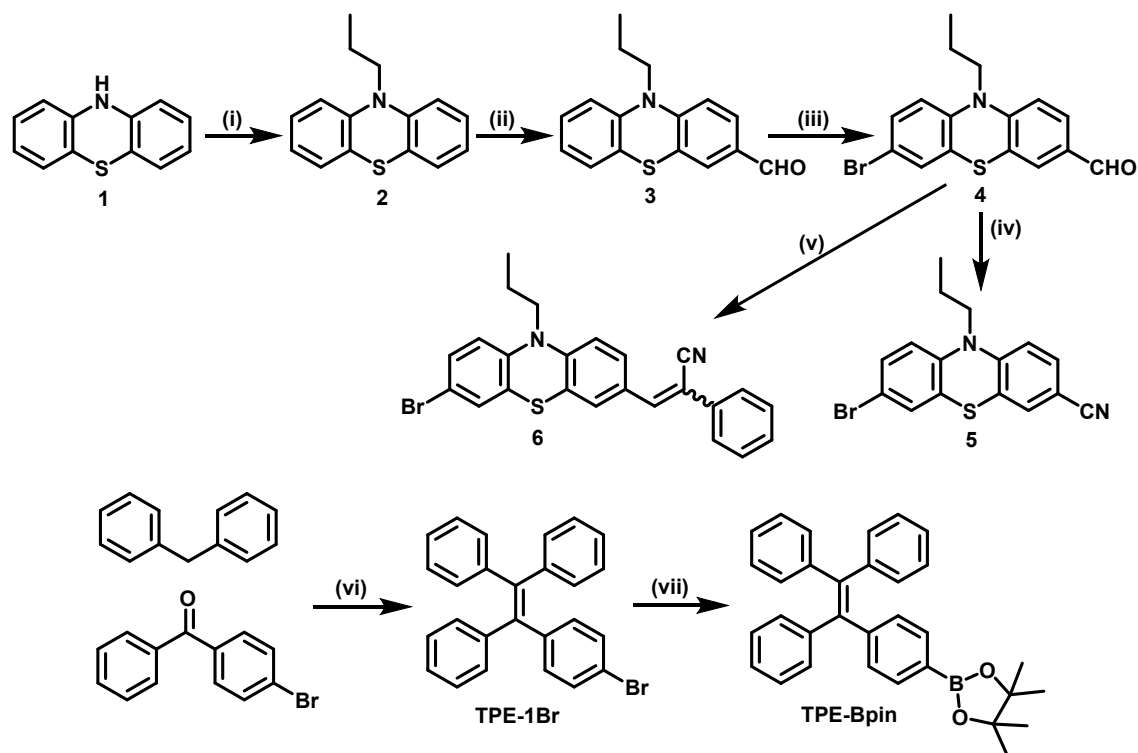

**Scheme S1.** Synthetic route for intermediates (i). n-propyliodide, NaOH, DMSO, 12h, RT; (ii). DMF/ $\text{POCl}_3$ , DCE, 0 °C to reflux, overnight; (iii). NBS, THF, 0 °C to RT. 1.5h; (iv).  $\text{NH}_2\text{OH}\cdot\text{HCl}$ , Pyridine, AcOH, DMF, reflux, 3.5h; (v). 2-phenylacetonitrile, NaOH(aq), THF, 70 °C, 12h; (vi). n-BuLi, THF, -5 °C to RT, overnight and then p-TSA, Toluene, 90 °C, 12 h; (vii). Bis(pinacolato)diboron, KOAc, Pd(dppf) $\text{Cl}_2$ , 1,4-dioxane, 80 °C, 12 h.

### Synthesis of 10-propyl-10H-phenothiazine (2)

Phenothiazine (5.0g, 25.1mmol) and propyl iodide (5.5g, 3.18mL, 32.6mmol) were dissolved in 50mL DMSO and stirred for 30min at room temperature. Sodium hydroxide (2.8g, 50mmol) was slowly added and stirred for overnight at room temperature. The reaction mixture was poured into water and extracted with dichloromethane. The organic layer was separated and dried over

anhydrous sodium sulfate. The product was purified using column chromatography with hexane. The product was obtained as white solid. Yield: 5.9g (97%).

### **Synthesis of 10-propyl-10H-phenothiazine-3-carbaldehyde (3)**

Compound **2** (5 g, 1.0eq) and dry DMF (4.0eq) was dissolved in 1,2-dichloroethane then phosphorous oxychloride (4.0eq) was added slowly at 0 °C in an ice water bath. The mixture was heated to reflux for overnight and was quenched with water and extracted three times with dichloromethane. The combined organic fraction was washed with brine and dried over Na<sub>2</sub>SO<sub>4</sub>. The solvent was removed under reduced pressure and the residue was purified by column chromatography using silica gel and n-hexane/dichloromethane (1/1; v/v) as the eluent to give yellow solid (5.6 g, 79% yield).

### **Synthesis of 7-bromo-10-propyl-10H-phenothiazine-3-carbaldehyde (4)**

NBS (1.1 eq) was added in one portion to the solution of **3** (1.5g, 1.0 eq) in THF (50 mL) at 0 °C. The mixture was allowed to room temperature and continued the stirring for 1.5 h Then the reaction was quenched by addition of water (50 mL) and extracted with DCM. The collected organic layer was evaporated under vacuum and the residue was purified by column chromatography to give the product as yellow solid (1.75g, 91% yield).

### **Synthesis of 7-bromo-10-propyl-10H-phenothiazine-3-carbonitrile (5)**

A mixture of **4** (2.05 g, 1.0eq), hydroxylamine hydrochloride (1.2eq), acetic acid (3.3eq) and pyridine (1.5eq) in DMF (25 mL) was stirred and heated to 138 °C for 3.5 h under argon atmosphere. After cooling to room temperature, the reaction was quenched by water and the mixture was extracted with CH<sub>2</sub>Cl<sub>2</sub>. The organic layer was dried with anhydrous Na<sub>2</sub>SO<sub>4</sub> and the solvent was removed by rotary evaporation. The crude product was further purified by column

chromatography (silica gel, hexane/dichloromethane 1/1 v/v) to give **5** as a light green solid (1.31 g, 66% yield).

#### **Synthesis of 2-phenyl-3-(10-propyl-10H-phenothiazin-3-yl)acrylonitrile (**6**)**

To a 50 mL schlenk flask capped with a rubber septum, 20 mL THF was injected via syringe. Compound **4** (2.0g 1.0eq), phenyl acetonitrile (1.2eq), and aqueous solution of NaOH (2.0eq in 2 mL H<sub>2</sub>O) were added to the flask. The resulting mixture was stirred for 12 h at 70 °C. The mixture was extracted with dichloromethane and aqueous solution of NH<sub>4</sub>Cl and purified by silica gel column chromatograph with *n*-hexane/EtOAc (v/v = 10:2) to provide an isomeric E/Z form of **6** in 85% yield (1.61 g) as a red orange solid.

#### **Synthesis of (2-(4-bromophenyl)ethene-1,1,2-triyl)tribenzene (TPE-1Br)**

*n*-BuLi (5.8mL) was added dropwise to a solution of diphenylmethane (2.0 g, 11.8 mmol) in 30 mL THF and allowed to react for 30 minutes to produce an orange-red diphenyl lithium solution and cooled it to -5 °C and then 4-bromobenzophenone (2.48 g, 9.5 mmol) was added. The reaction mixture was stirred at room temperature for overnight, and then quenched with saturated NH<sub>4</sub>Cl solution and extracted with dichloromethane; the organic phase was dried with anhydrous Na<sub>2</sub>SO<sub>4</sub> and the desiccant was removed by suction filtration. The solvent was evaporated under reduced pressure to give the solid. Then the solid was dissolved in 25 mL toluene, and a catalytic amount of *p*-toluenesulfonic acid was added and allowed to reflux for 12 hours. The *p*-toluenesulfonic acid and the generated water were separated by an oil–water separator. The crude product was recrystallized from dichloromethane and methanol to give a white powder (3.0g). Yield: 61%.

**Synthesis of 4,4,5,5-tetramethyl-2-(4-(1,2,2-triphenylvinyl)phenyl)-1,3,2-dioxaborolane (TPE-Bpin)**

A mixture of **TPE-1Br** (1.5g, 1.0eq), Bis(pinacolato)diboron (1.2eq), KOAc (4.0eq) and Pd(dppf)Cl<sub>2</sub> (73mg, 0.1mmol) was dissolved in 40 mL 1,4-dioxane and purged with argon for 15 minutes and refluxed the reaction mixture for overnight. After completion of reaction solvents were dried and solid residue was worked up with dichloromethane/water. The organic layer was separated and dried over anhydrous sodium sulfate. The product was purified using column chromatography with hexane/dichloromethane (4/1 v/v). The product was obtained as white solid. Yield: 1.4g (84 %).

a).

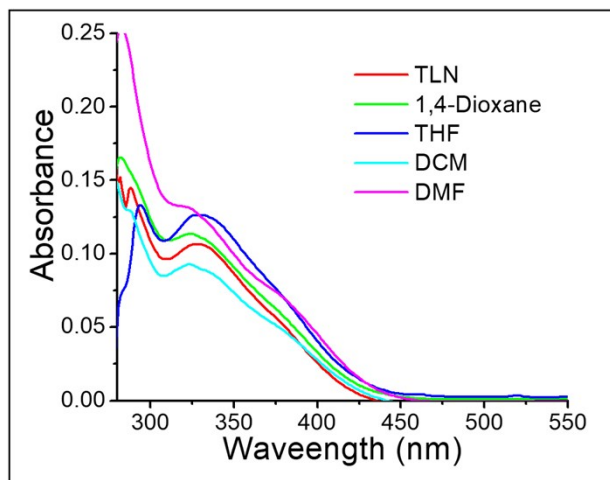

b).

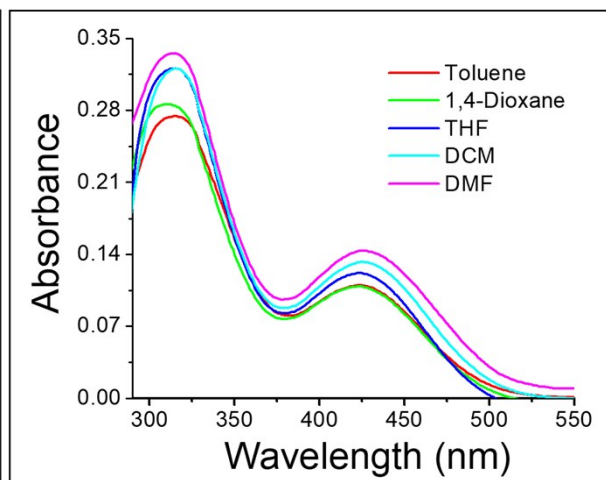

**Figure S1** Absorption spectra of **PTZTPE-2** (a) and **PTZTPE-3** (b) in different polarity solvents.

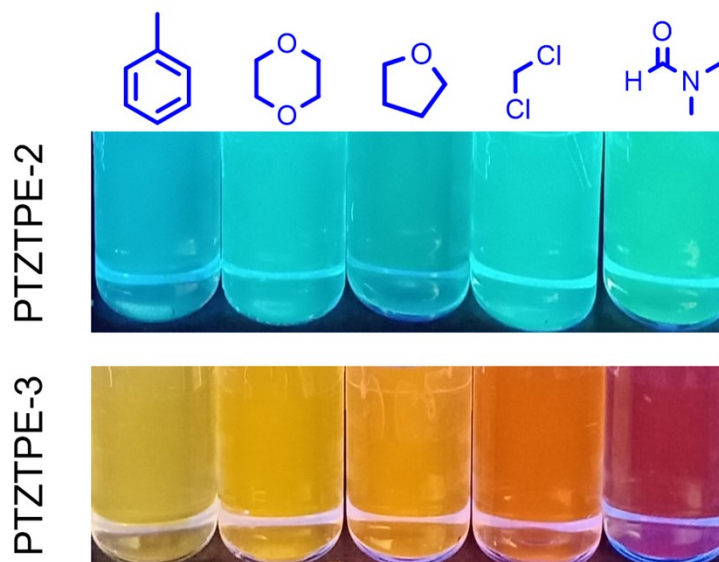

**Figure S2** Photograph of compounds **PTZTPE-2** and **PTZTPE-3** in solvents of different polarity (from left to right, toluene to DMF) taken under 365 nm UV illumination.

**Table S1** Photophysical properties of compounds **PTZTPE-2** and **PTZTPE-3**.

| Compounds       | Solvent        | $\lambda_{ab}$ (nm) <sup>a</sup> | $\lambda_{em}$ (nm) <sup>a</sup> | Stokes shift (cm <sup>-1</sup> ) |
|-----------------|----------------|----------------------------------|----------------------------------|----------------------------------|
| <b>PTZTPE-2</b> | Toluene        | 328                              | 480                              | 9655                             |
|                 | 1,4-Dioxane    | 323                              | 481                              | 10170                            |
|                 | Tetrahydrofura | 322                              | 482                              | 10309                            |
|                 | n              | 323                              | 485                              | 10341                            |
|                 | DCM            | 322                              | 492                              | 10731                            |
|                 | DMF            |                                  |                                  |                                  |
| <b>PTZTPE-3</b> | Toluene        | 424                              | 563                              | 5823                             |
|                 | 1,4-Dioxane    | 423                              | 573                              | 6189                             |
|                 | Tetrahydrofura | 423                              | 585                              | 6547                             |
|                 | n              | 425                              | 598                              | 6807                             |
|                 | DCM            | 425                              | 613                              | 7216                             |
|                 |                |                                  |                                  |                                  |

|  |     |  |  |  |
|--|-----|--|--|--|
|  | DMF |  |  |  |
|--|-----|--|--|--|

(<sup>a</sup> absorption and emission maxima values recorded in different polarity solvents, <sup>b</sup> the fluorescence quantum yields were measured using quinine sulphate as a standard in 0.5 M H<sub>2</sub>SO<sub>4</sub> solution for **PTZTPE-2** and rhodamine-6G as standard in ethanol for **PTZTPE-3**)

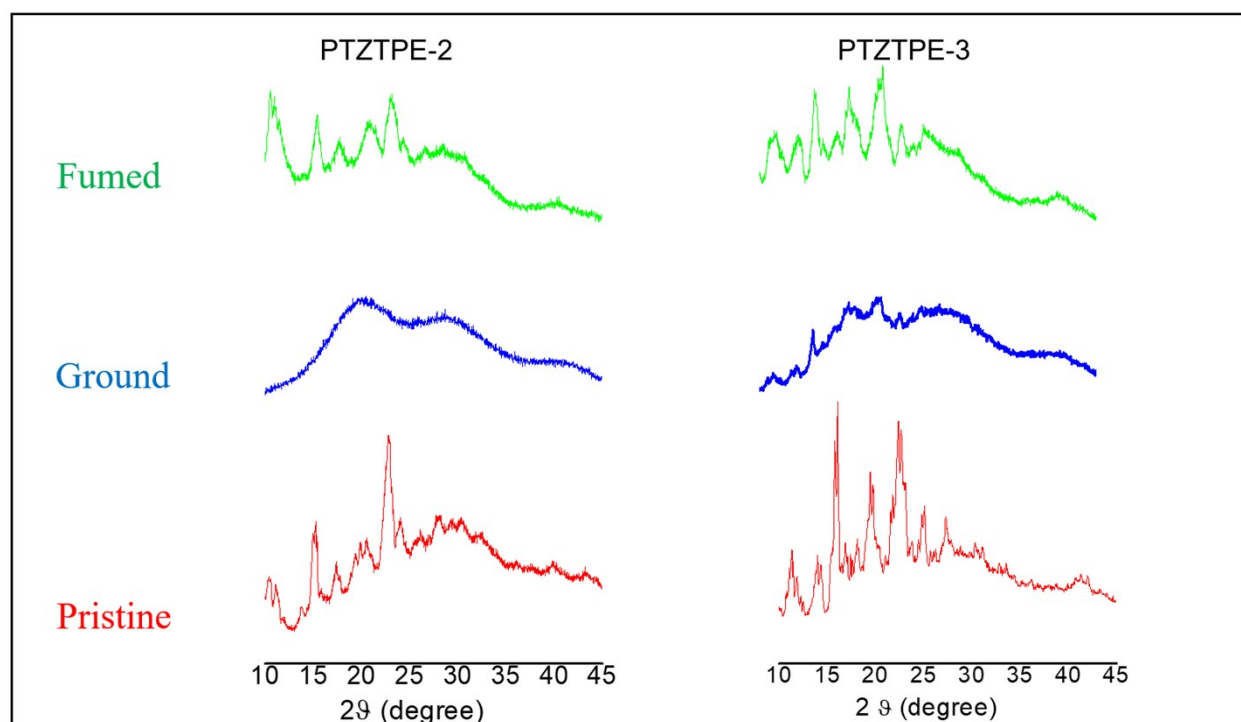

**Figure S3** XRD patterns of **PTZTPE-2** and **PTZTPE-3**.

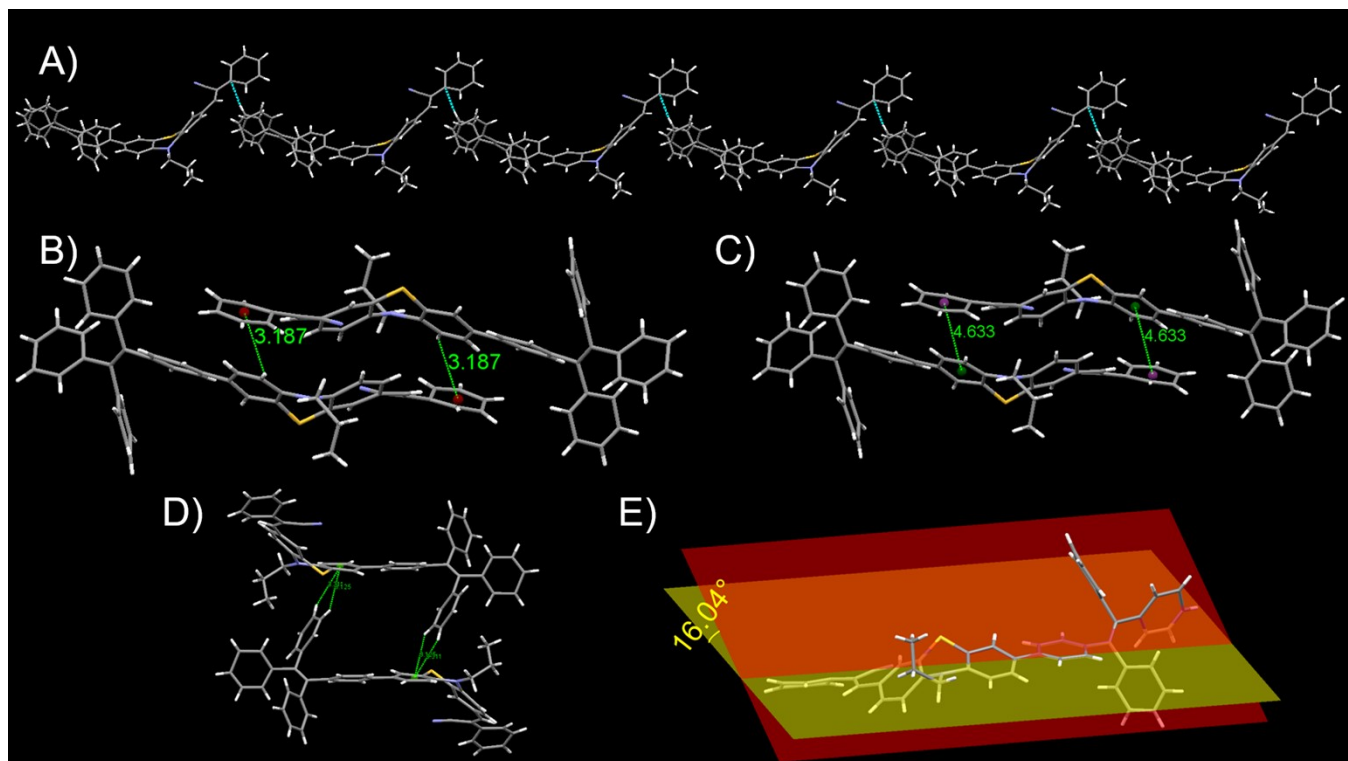

**Figure S4** Packing diagram and dimeric interactions in the crystal structure of **PTZTPE-3**.

### Crystallographic data

The crystal and refinement data are summarized in Table S2. The CCDC number 2011118 contains the supplementary crystallographic data for **PTZTPE-3**. These data can be obtained free of charge via [www.ccdc.cam.ac.uk](http://www.ccdc.cam.ac.uk) (or from the Cambridge Crystallographic Data Centre, 12 union Road, Cambridge CB21 EZ, UK; Fax: (+44) 1223- 336-033; or [deposit@ccdc.cam.ac.uk](mailto:deposit@ccdc.cam.ac.uk)).

**Table S2** Crystal data and structure refinement for **PTZTPE-3**.

|                     |                       |
|---------------------|-----------------------|
| Identification code | <b>1</b>              |
| Empirical formula   | $C_{50}H_{38}N_2S_2O$ |
| Formula weight      | 730.88                |
| Temperature         | 293(2)K               |



|                                                  |                                             |
|--------------------------------------------------|---------------------------------------------|
| Wavelength                                       | 154184 Å                                    |
| Crystal system, space group                      | Triclinic, <i>P-1</i>                       |
| a/(Å)                                            | 9.744                                       |
| b/(Å)                                            | 13.109                                      |
| c/(Å)                                            | 16.277                                      |
| Alpha/(°)                                        | 101.24                                      |
| Beta/(°)                                         | 97.14                                       |
| Gamma/(°)                                        | 92.17                                       |
| Volume                                           | 2019.4(11) Å <sup>3</sup>                   |
| Z, calculated density                            | 2, 1.202 mg/m <sup>3</sup>                  |
| Absorption coefficient                           | 1.034 mm <sup>-1</sup>                      |
| F(000)                                           | 768                                         |
| Crystal size                                     | 0.330 x 0.260 x 0.210                       |
| Θ range for data collection/(°)                  | 3.975 to 70.709                             |
| Reflections collected / unique                   | 14813 / 7421 [R(int) = 0.2796]              |
| Completeness to theta                            | 67.684 98.5%                                |
| Refinement method                                | Full-matrix least-squares on F <sup>2</sup> |
| Data / restraints / parameters                   | 7421/0/496                                  |
| Goodness-of-fit on F2                            | 0.836                                       |
| Final R indices [I>2sigma(I)]                    | R1 = 0.1625, wR2 = 0.3730                   |
| R indices (all data)                             | R1 = 0.4214, wR2 = 0.5677                   |
| Extinction coefficient                           | n/a                                         |
| Largest diff. peak and hole (e.Å <sup>-3</sup> ) | 0.234 and -0.338                            |

**Table S3** Calculated major electronic transitions for **PTZTPE-2** and **PTZTPE-3** in the gas phase.

| Compounds       | Wavelength (nm) | Composition         | Assignment | $f^u$ |
|-----------------|-----------------|---------------------|------------|-------|
| <b>PTZTPE-2</b> | 372             | HOMO-LUMO<br>(0.65) | ICT        | 0.55  |
| <b>PTZTPE-3</b> | 477             | HOMO-LUMO<br>(0.69) | ICT        | 0.55  |

(Data obtained from TD-DFT calculations carried out using the Gaussian 09W program performed at the B3LYP/6-31G(d,p) level).

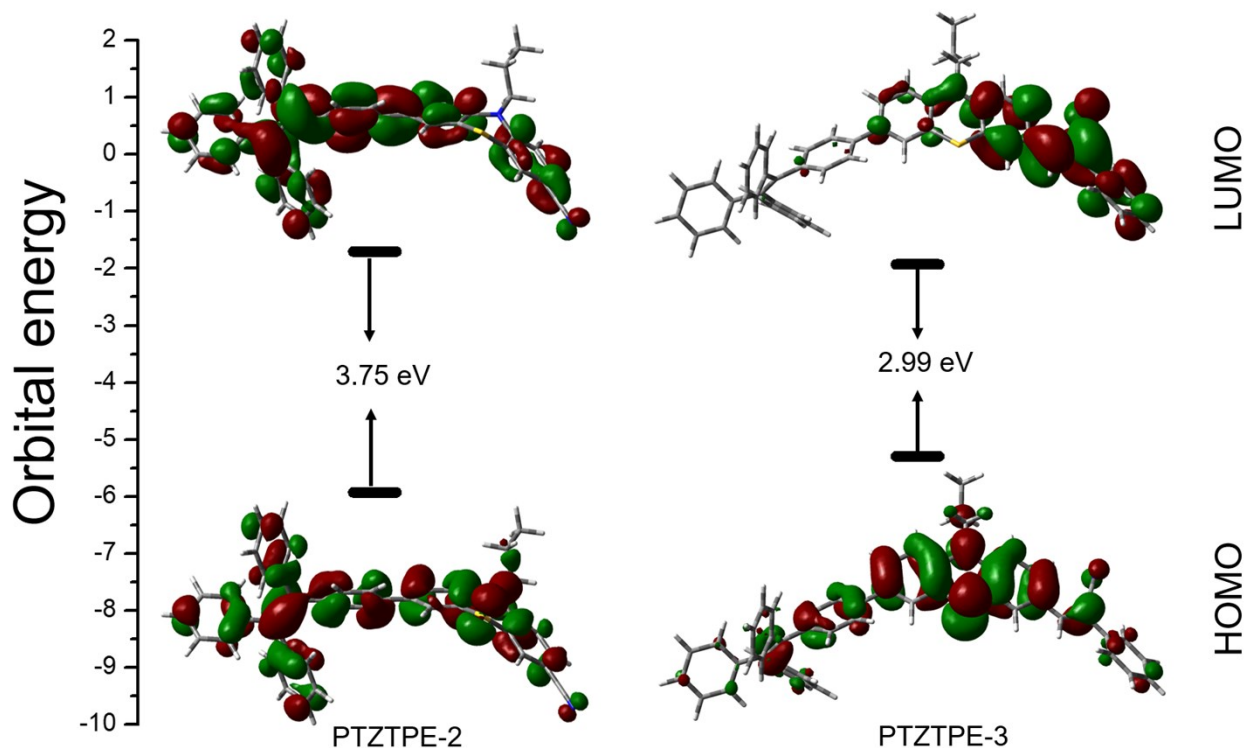

**Figure S5** Energy level diagram of **PTZTPE-2** and **PTZTPE-3**.

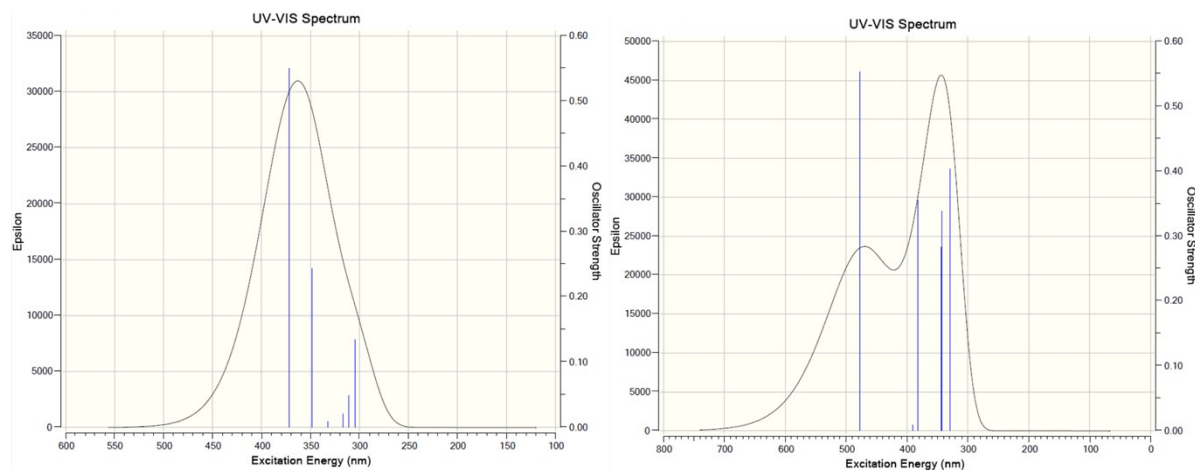

**Figure S6** Simulated absorption spectra of **PTZTPE-2** (left) and **PTZTPE-3** (right).

**Table S4.** Theoretical data of **PTZTPE-2** and **PTZTPE-3**.

| Compounds       | $E_{HOMO}^a$ (eV) | $E_{LUMO}^a$ (eV) | $E_g^a$ (eV) |
|-----------------|-------------------|-------------------|--------------|
| <b>PTZTPE-2</b> | -5.53             | -1.78             | 3.75         |
| <b>PTZTPE-3</b> | -4.97             | -1.98             | 2.99         |

(<sup>a</sup> Theoretical data obtained from DFT calculations performed using the Gaussian 09W program at B3LYP/6-31G(d,p) level)

**Table S5.** Solid state emission maxima of compounds **PTZTPE-2** and **PTZTPE-3**.

| Compounds       | Emission                            |                         |                        |                                   |
|-----------------|-------------------------------------|-------------------------|------------------------|-----------------------------------|
|                 | $\lambda_{pristine}$ (nm)           | $\lambda_{ground}$ (nm) | $\lambda_{fumed}$ (nm) | $\Delta\lambda$ (nm) <sup>a</sup> |
| <b>PTZTPE-2</b> | 517                                 | 489                     | 512                    | -28                               |
| <b>PTZTPE-3</b> | 593 <sup>1</sup> , 590 <sup>2</sup> | 611                     | 586                    | +21                               |

<sup>1</sup>For pristine-o form, <sup>2</sup>for pristine-y form, <sup>a</sup>grinding-induced spectral shift, [ $\Delta\lambda = \lambda_{\text{ground}} - \lambda_{\text{pristine}}$ ].

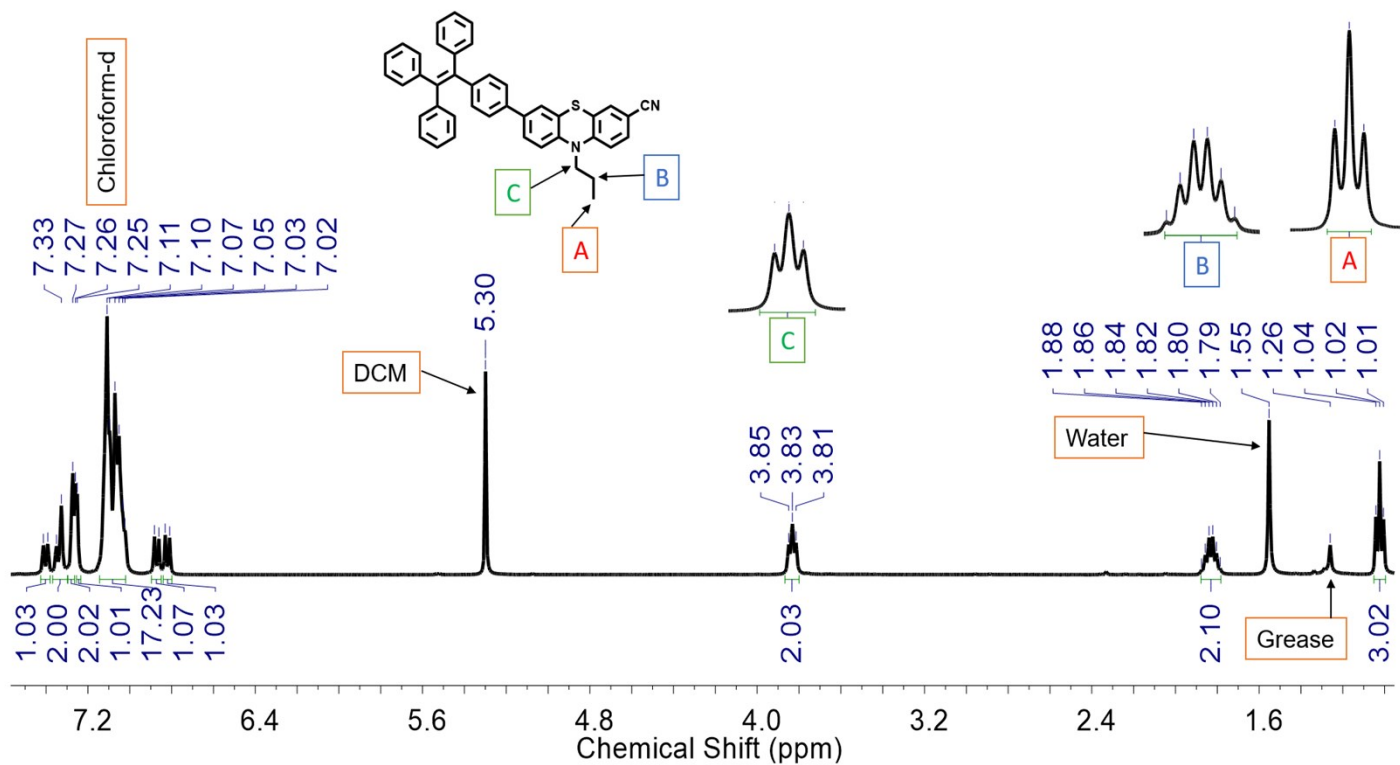

<sup>1</sup>H NMR spectrum of **PTZTPE-2**

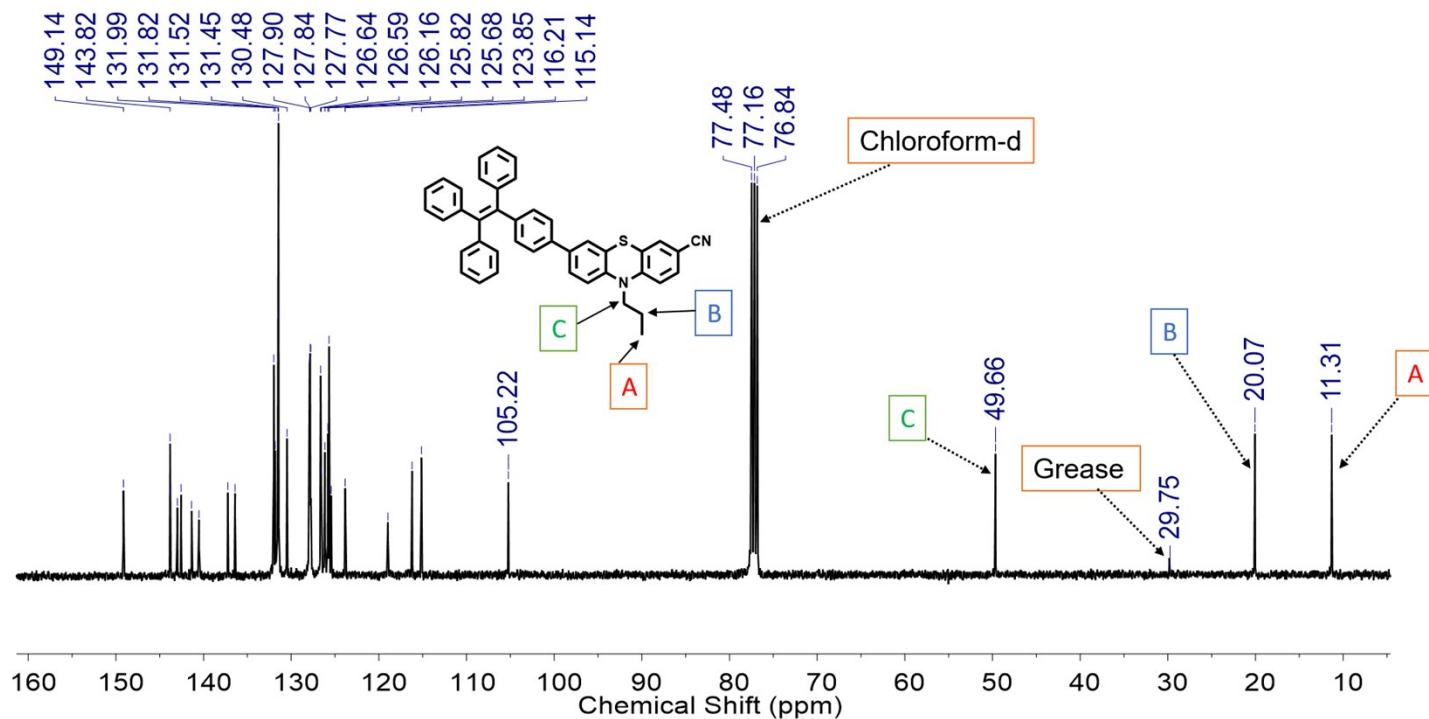

$^{13}\text{C}$  NMR spectrum of PTZTPE-2

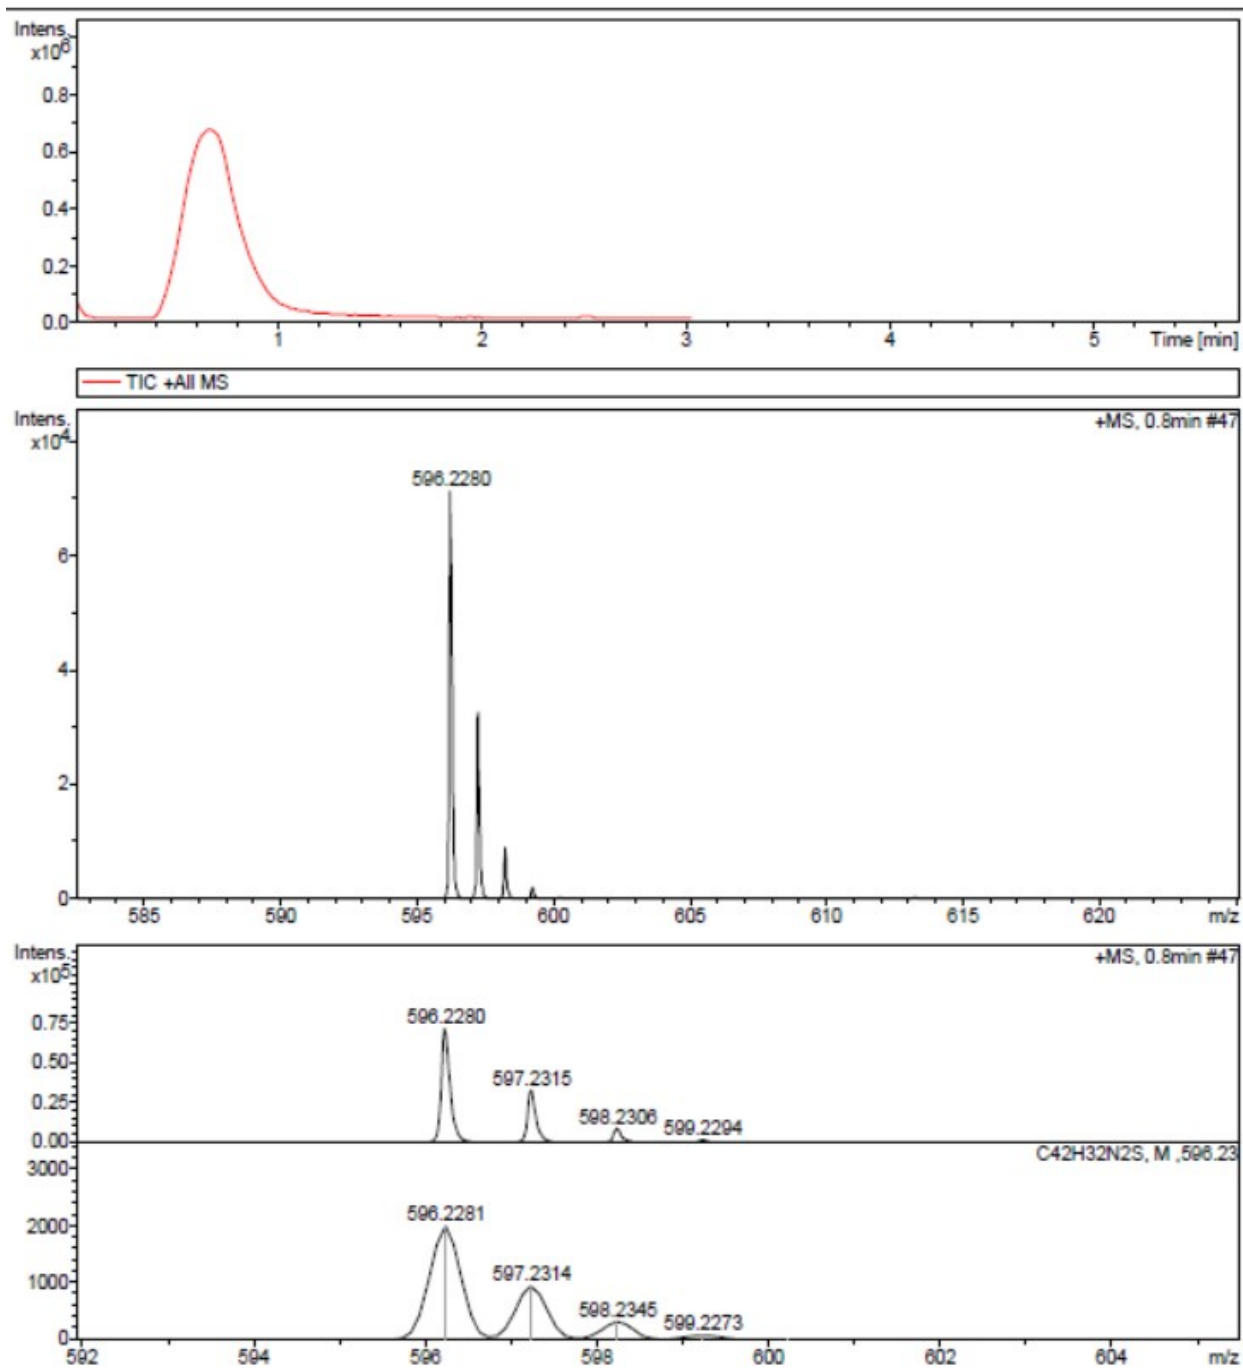

HRMS of PTZTPE-2

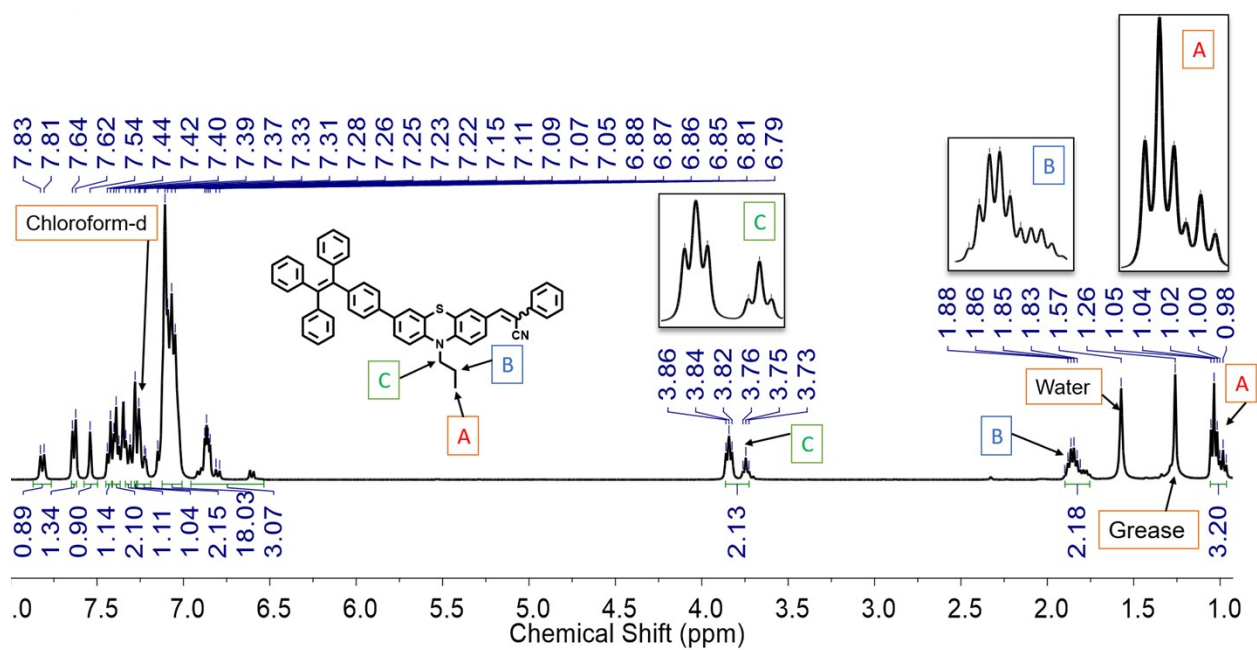

<sup>1</sup>H NMR spectrum of PTZTPE-3

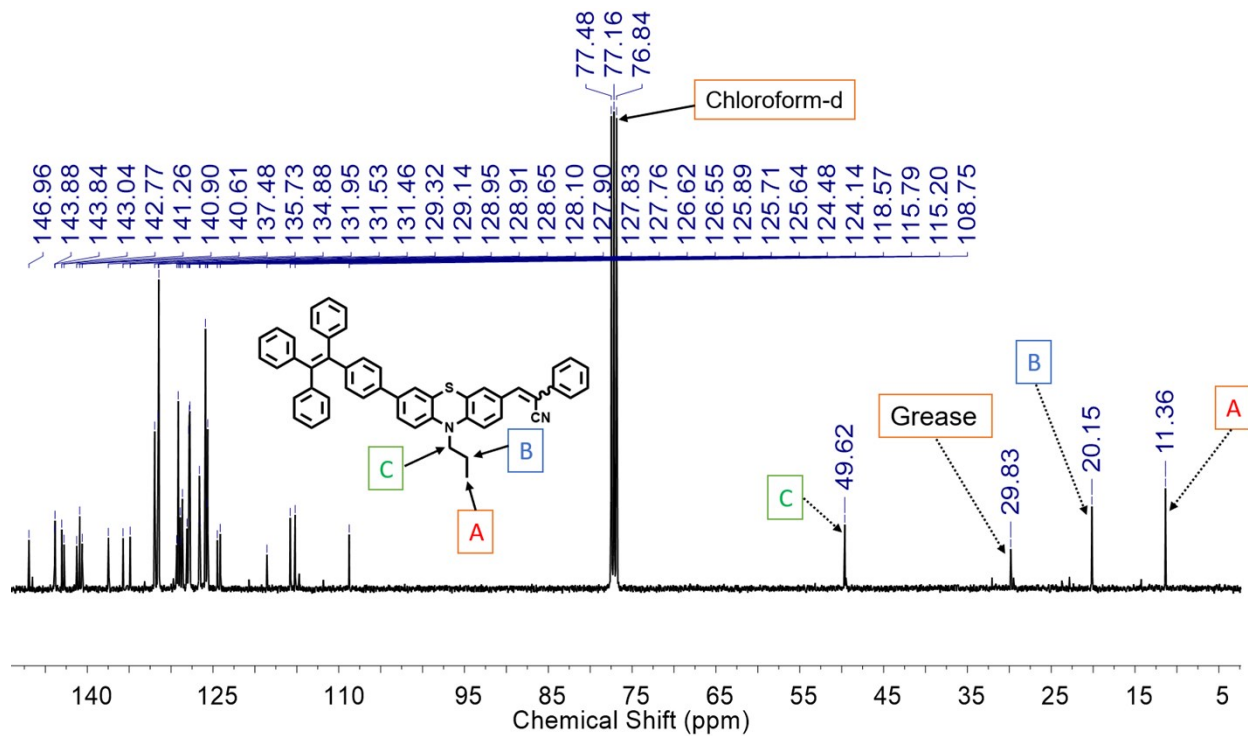

<sup>13</sup>C NMR spectrum of PTZTPE-3

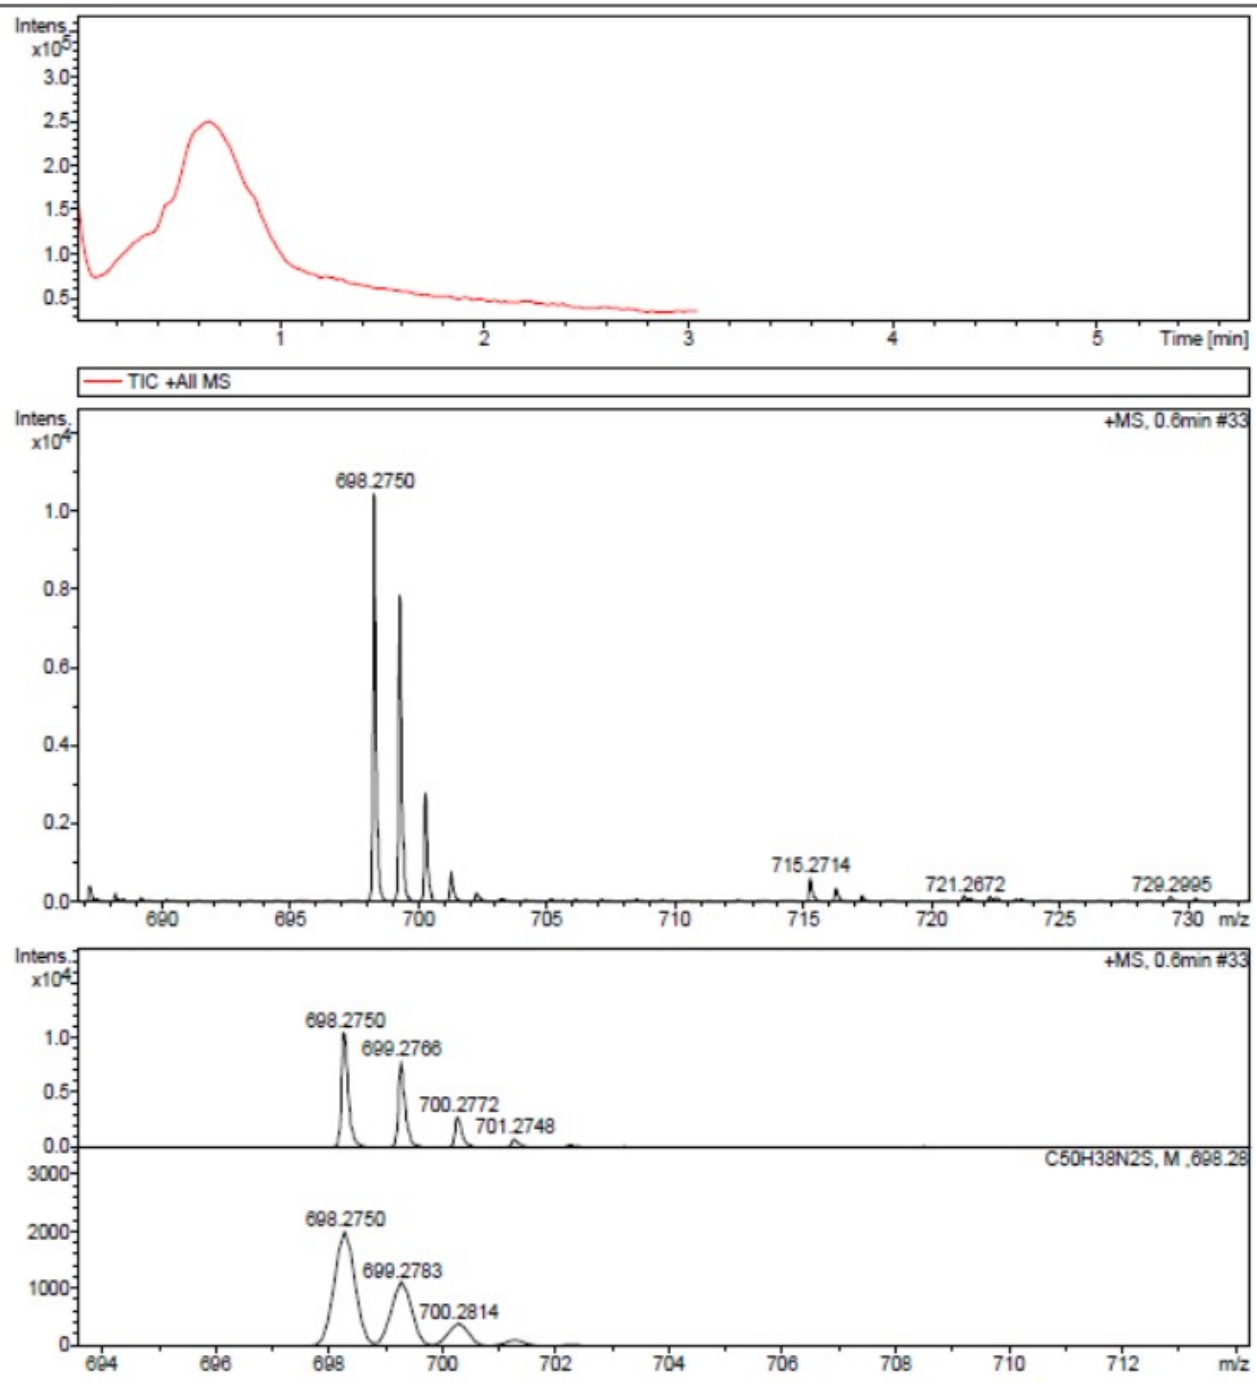

HRMS of PTZTPE-3

## **Processing and investigation methods of solid films and devices based on them.**

Steady-state PL spectra of films were recorded using an Edinburgh Instruments FLS980 spectrometer. A PicoQuant LDH-D-C-375 laser (wavelength 374 nm) equipped to the FLS980 as the excitation source for the recording photoluminescence decay curves. Photoluminescence quantum yields (accuracy  $\pm 2\%$ ) of the films were measured using the integrated sphere method.

The ionization potential of the solid-state sample was measured by photoelectron emission spectrometry in air. The experimental setup consisted a deep UV deuterium light source ASBN-D130-CM, a CM110 1/8m monochromator, and an electrometer 6517B Keithley. The charge carrier mobility ( $\mu$ ) measurements of vacuum deposited layer were carried out by the time of flight method (TOF). The thickness of the layer was measured utilizing a method of carrier extraction in linearly increasing voltage (CELIV). The TOF experimental setup consisted of a pulsed Nd:YAG laser (EKSPLA NL300, a wavelength of 355 nm, pulse duration 3-6 ns), a Keithley 6517B electrometer, a Tektronix TDS 3052C oscilloscope, and was as described in reference. The transit time ( $t_t$ ) with the applied bias ( $V$ ) indicated the passage of charges through the entire thickness ( $d$ ) of the samples. Hole mobility was calculated as  $\mu = d^2 / U \cdot t_t$

OLEDs were prepared by vacuum deposition of organic and metal layers onto pre-cleaned ITO coated glass substrate under pressure lower than  $2 \times 10^{-6}$  mBar. ITO-coated glass substrates with a sheet resistance of  $15 \Omega/\text{sq}$  were patterned to get seven independent structures. The substrates were pre cleaned in acetone and isopropyl alcohol ultrasonic baths during ca. 10 min and by UV treatment during 15 min before deposition of the layers. Organic layers and aluminium layers were vacuum-deposited under the vacuum higher than  $2 \times 10^{-6}$  mBar using vacuum equipment from Kurt J. Lesker in-built in an MB EcoVap4G glove box. Devices based on hyperfluorescence emitting layer were fabricated with the following architecture ITO/MoO<sub>3</sub>/TFB/EML/TSP01/TPBi/LiF:Al.



The TFB and EML layers were fabricated by solution processing. The TFB layer was spin-coated using its 4 mg/ml solution. The EML layer containing three components co-hosts pCNBCzoCF<sub>3</sub> (15 wt %) and mCP (83 wt %) and emitter PTZTPE-1, PTZTPE-3, PTZTPE-4 (2 wt %) was spin-coated using their 5mg/ml solution. The fabricated layers were annealed for 30 minutes on the hot plate after each solution processing. Temperatures of 150 °C and 70 °C were used for TFB and EML layers, respectively. The density-voltage and luminance-voltage characteristics of the fabricated devices were simultaneously recorded using the Keithley 2400C sourcemeter and the certificated photodiode PH100-Si-HA-D0 together with the PCBased Power and Energy Monitor 11S-LINK in air without passivation immediately after taking out of the samples from inert atmosphere. Electroluminescence (EL) spectra were taken by an Avenues AvaSpec-2048XL spectrometer. External quantum efficiency was calculated from the luminance, current density, and EL spectrum. The chromaticity coordinates (x, y) of the devices were calculated using EL spectra.

**Table S6.** PL decay fitting results for the studied doped spin-coated films.

|                                                         | <b>t<sub>1</sub>, ns</b> | <b>Influence %</b> | <b>t<sub>2</sub>, ns</b> | <b>Influence %</b> | <b>χ<sup>2</sup></b> |
|---------------------------------------------------------|--------------------------|--------------------|--------------------------|--------------------|----------------------|
| <b>pCNBCzoCF<sub>3</sub>:mCP (15:85 wt%)</b>            | 12.44                    | 92.21              | 253.21                   | 7.79               | 1.12                 |
| <b>PTZTPE-1:mCP (10:90wt%)</b>                          | 1.79                     | 100                | -                        | -                  | 0.94                 |
| <b>PTZTPE-1: pCNBCzoCF<sub>3</sub>:mCP (2:15:83wt%)</b> | 1.8                      | 55.47              | 9.54                     | 44.53              | 1.04                 |
| <b>PTZTPE-3:mCP (10:90wt%)</b>                          | 5.89                     | 100                | -                        | -                  | 1.07                 |
| <b>PTZTPE-3: pCNBCzoCF<sub>3</sub>:mCP (2:15:83wt%)</b> | 6.7                      | 100                | -                        | -                  | 0.93                 |
| <b>PTZTPE-4:mCP (10:90wt%)</b>                          | 2.41                     | 100                | -                        | -                  | 1.08                 |
| <b>PTZTPE-4: pCNBCzoCF<sub>3</sub>:mCP (2:15:83wt%)</b> | 2.95                     | 80.25              | 12.23                    | 19.75              | 1.14                 |

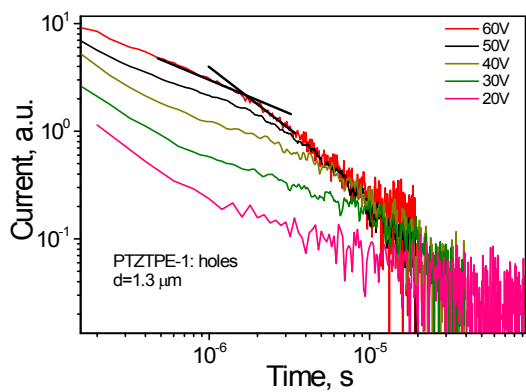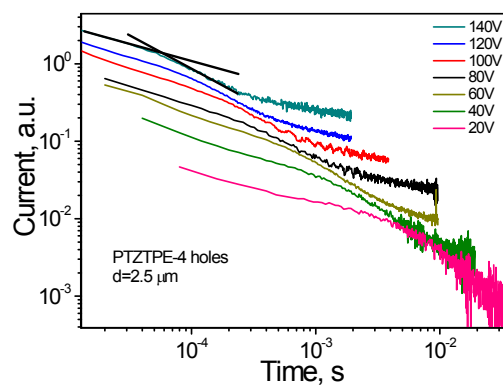

**Figure S7.** TOF signals for holes for the layers of **PTZTPE-1** and **PTZTPE-4**.

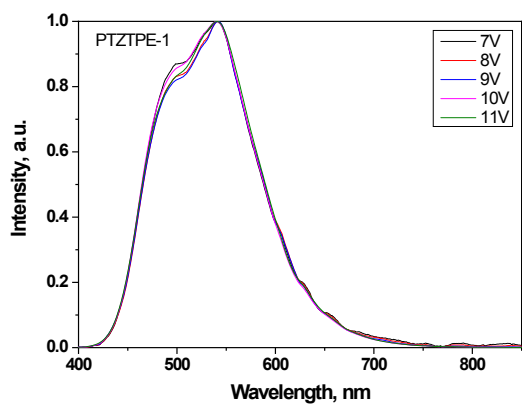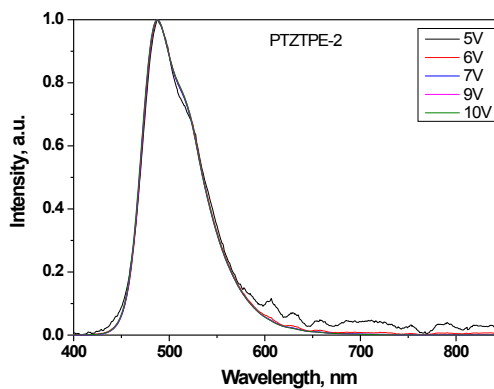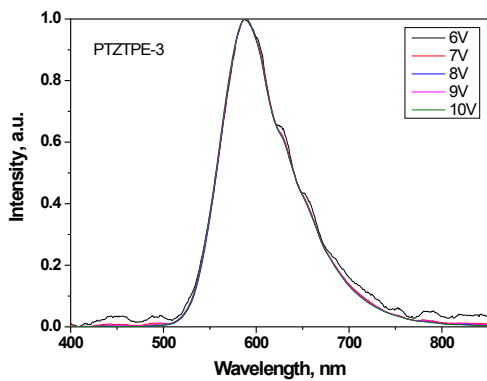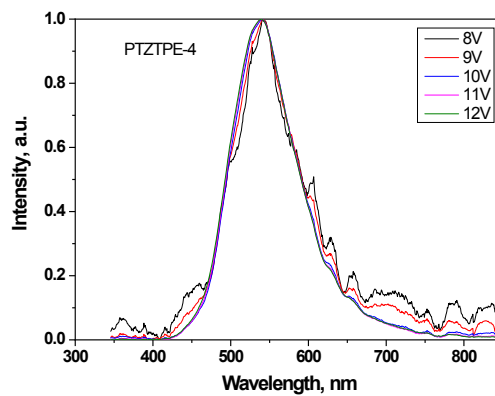

a)

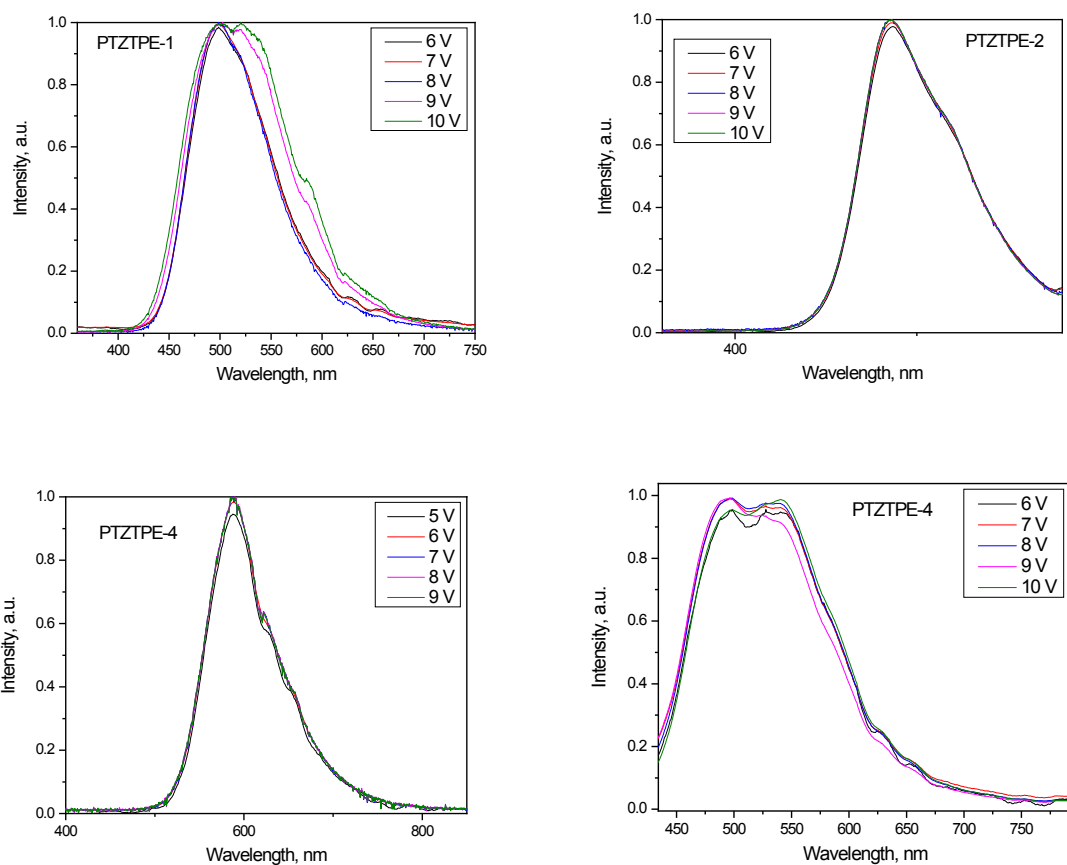

b)

**Figure S8.** EL spectra of vacuum-processed (a) and solution-processed (b) non-doped OLEDs based on the corresponding **PTZTPE** emitters.

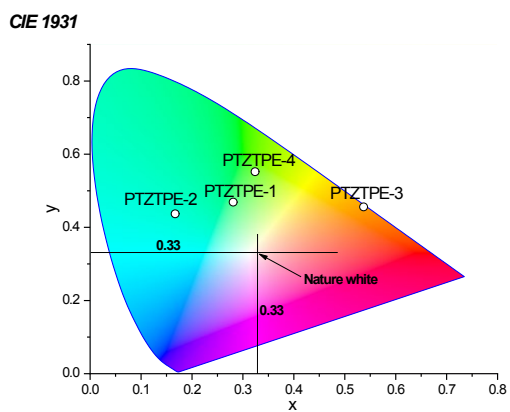

**Figure S9.** CIE colour coordinates at 6V of vacuum-processed non-doped OLEDs based on the corresponding **PTZTPE** emitters.

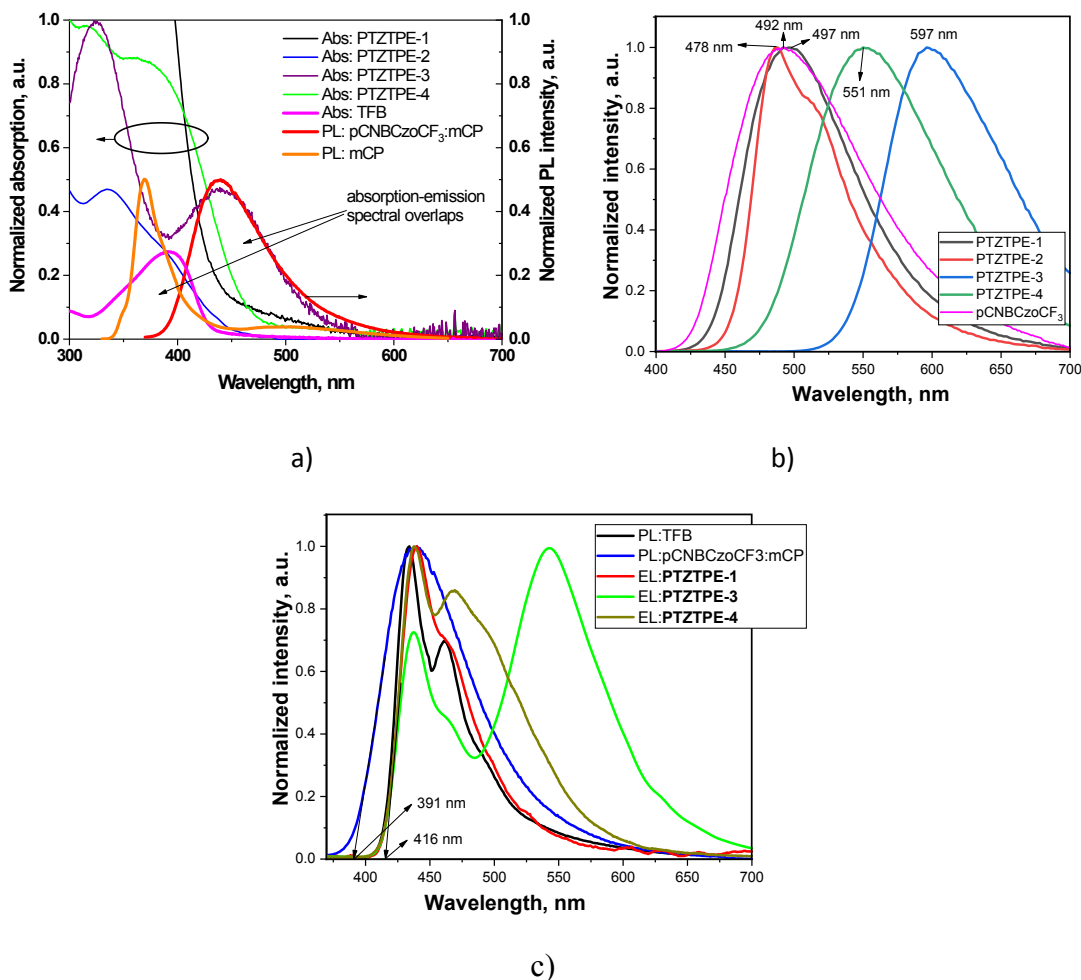

**Figure S10.** Absorption (a) and PL spectra of **PTZTPE** films and PL spectrum (b) of doped pCNBCzoCF<sub>3</sub>:mCP or non-doped pCNBCzoCF<sub>3</sub> films as well as PL of TFB and pCNBCzoCF<sub>3</sub>:mCP films and EL spectra of **PTZTPE**-based devices (c).

## DFT (PTZTPE-2)

Standard orientation:

| Center Number | Atomic Number | Atomic Type | Coordinates (Angstroms) |          |           |
|---------------|---------------|-------------|-------------------------|----------|-----------|
|               |               |             | X                       | Y        | Z         |
| 1             | 6             | 0           | -6.238702               | 0.609160 | 1.068452  |
| 2             | 6             | 0           | -6.972179               | 1.660212 | 1.608597  |
| 3             | 6             | 0           | -8.115794               | 2.141445 | 0.946125  |
| 4             | 6             | 0           | -8.482458               | 1.577703 | -0.285849 |
| 5             | 6             | 0           | -7.723942               | 0.552296 | -0.842031 |
| 6             | 6             | 0           | -6.601129               | 0.031651 | -0.171088 |
| 7             | 1             | 0           | -6.671263               | 2.097237 | 2.554869  |
| 8             | 1             | 0           | -9.349553               | 1.957298 | -0.815523 |

|    |    |   |           |           |           |
|----|----|---|-----------|-----------|-----------|
| 9  | 1  | 0 | -8.005550 | 0.164071  | -1.813348 |
| 10 | 6  | 0 | -2.444040 | -0.357885 | 0.713185  |
| 11 | 6  | 0 | -3.827977 | -0.478444 | 0.597970  |
| 12 | 6  | 0 | -4.419581 | -0.936943 | -0.592651 |
| 13 | 6  | 0 | -3.571338 | -1.271230 | -1.658661 |
| 14 | 6  | 0 | -2.185942 | -1.184460 | -1.525931 |
| 15 | 1  | 0 | -2.028700 | 0.042853  | 1.632506  |
| 16 | 1  | 0 | -3.986976 | -1.618238 | -2.597694 |
| 17 | 1  | 0 | -1.561159 | -1.491340 | -2.358773 |
| 18 | 7  | 0 | -5.834489 | -1.028283 | -0.688556 |
| 19 | 16 | 0 | -4.881510 | -0.091964 | 1.984149  |
| 20 | 6  | 0 | -6.427207 | -1.943538 | -1.671833 |
| 21 | 1  | 0 | -6.165095 | -1.655533 | -2.702154 |
| 22 | 1  | 0 | -7.510653 | -1.845286 | -1.586930 |
| 23 | 6  | 0 | -6.068276 | -3.414413 | -1.414418 |
| 24 | 1  | 0 | -4.982647 | -3.551333 | -1.430355 |
| 25 | 1  | 0 | -6.400797 | -3.676353 | -0.403228 |
| 26 | 6  | 0 | -6.721361 | -4.342939 | -2.444656 |
| 27 | 1  | 0 | -6.385740 | -4.112813 | -3.462834 |
| 28 | 1  | 0 | -7.814321 | -4.258062 | -2.427340 |
| 29 | 1  | 0 | -6.468011 | -5.388077 | -2.242151 |
| 30 | 6  | 0 | -1.589524 | -0.728706 | -0.339364 |
| 31 | 6  | 0 | -0.115637 | -0.630168 | -0.198162 |
| 32 | 6  | 0 | 0.521851  | -0.936588 | 1.017471  |
| 33 | 6  | 0 | 0.695906  | -0.234527 | -1.276245 |
| 34 | 6  | 0 | 1.905725  | -0.848487 | 1.148111  |
| 35 | 1  | 0 | -0.068411 | -1.277240 | 1.863201  |
| 36 | 6  | 0 | 2.078659  | -0.136073 | -1.141403 |
| 37 | 1  | 0 | 0.238820  | 0.023928  | -2.226988 |
| 38 | 6  | 0 | 2.715113  | -0.429194 | 0.077166  |
| 39 | 1  | 0 | 2.368020  | -1.112044 | 2.094873  |
| 40 | 1  | 0 | 2.675191  | 0.180776  | -1.990689 |
| 41 | 6  | 0 | 4.200282  | -0.356758 | 0.224150  |
| 42 | 6  | 0 | 4.932577  | 0.721246  | -0.189697 |
| 43 | 6  | 0 | 4.824622  | -1.555757 | 0.866123  |
| 44 | 6  | 0 | 6.425197  | 0.693856  | -0.284455 |
| 45 | 6  | 0 | 4.303591  | 2.020179  | -0.583638 |
| 46 | 6  | 0 | 4.503360  | -2.852444 | 0.425736  |
| 47 | 6  | 0 | 5.700960  | -1.423799 | 1.957317  |
| 48 | 6  | 0 | 7.195527  | 1.739700  | 0.255929  |
| 49 | 6  | 0 | 7.094087  | -0.341149 | -0.961119 |
| 50 | 6  | 0 | 4.677623  | 2.662560  | -1.777971 |
| 51 | 6  | 0 | 3.366504  | 2.658719  | 0.247509  |
| 52 | 6  | 0 | 5.064561  | -3.976762 | 1.032872  |
| 53 | 1  | 0 | 3.812298  | -2.977054 | -0.403075 |
| 54 | 6  | 0 | 6.253423  | -2.547649 | 2.573825  |
| 55 | 1  | 0 | 5.947262  | -0.432295 | 2.323746  |
| 56 | 6  | 0 | 8.587337  | 1.732748  | 0.154346  |
| 57 | 1  | 0 | 6.697447  | 2.560735  | 0.763428  |
| 58 | 6  | 0 | 8.485149  | -0.342631 | -1.075357 |

|    |   |   |           |           |           |
|----|---|---|-----------|-----------|-----------|
| 59 | 1 | 0 | 6.516741  | -1.147374 | -1.402101 |
| 60 | 6 | 0 | 4.107775  | 3.882090  | -2.146452 |
| 61 | 1 | 0 | 5.417187  | 2.197123  | -2.423195 |
| 62 | 6 | 0 | 2.805762  | 3.884977  | -0.112929 |
| 63 | 1 | 0 | 3.079250  | 2.189132  | 1.182987  |
| 64 | 6 | 0 | 5.942631  | -3.829240 | 2.110915  |
| 65 | 1 | 0 | 4.812138  | -4.968202 | 0.667171  |
| 66 | 1 | 0 | 6.924797  | -2.421060 | 3.418514  |
| 67 | 6 | 0 | 9.239057  | 0.690781  | -0.512307 |
| 68 | 1 | 0 | 9.162463  | 2.544456  | 0.591079  |
| 69 | 1 | 0 | 8.979353  | -1.151065 | -1.606856 |
| 70 | 6 | 0 | 3.168110  | 4.499150  | -1.315028 |
| 71 | 1 | 0 | 4.402008  | 4.353017  | -3.080272 |
| 72 | 1 | 0 | 2.087114  | 4.361810  | 0.547699  |
| 73 | 1 | 0 | 6.374282  | -4.703753 | 2.589148  |
| 74 | 1 | 0 | 10.321834 | 0.688507  | -0.598405 |
| 75 | 1 | 0 | 2.729393  | 5.451935  | -1.596969 |
| 76 | 6 | 0 | -8.887666 | 3.203496  | 1.518576  |
| 77 | 7 | 0 | -9.516708 | 4.067220  | 1.982056  |

-----  
Rotational constants (GHZ):      0.1328837      0.0251328      0.0231286

## TD-DFT (PTZTPE-2)

Excitation energies and oscillator strengths:

Excited State 1:      Singlet-A      3.3317 eV   372.14 nm   f=0.5497  
<S\*\*2>=0.000  
156 ->159      -0.17594  
157 ->158      0.65435  
157 ->159      0.15240

This state for optimization and/or second-order correction.

Total Energy, E(TD-HF/TD-KS) = -2127.36012459

Copying the excited state density for this state as the 1-particle RhoCI density.

Excited State 2:      Singlet-A      3.5582 eV   348.44 nm   f=0.2436  
<S\*\*2>=0.000  
156 ->158      -0.36320  
156 ->159      -0.16288  
157 ->158      -0.22678  
157 ->159      0.51456

Excited State 3:      Singlet-A      3.7333 eV   332.10 nm   f=0.0089  
<S\*\*2>=0.000  
156 ->158      0.57696  
157 ->159      0.37778

Excited State 4:      Singlet-A      3.9158 eV   316.62 nm   f=0.0209  
<S\*\*2>=0.000

```

155 ->159      -0.10590
156 ->160      -0.28636
156 ->161      -0.16291
157 ->160       0.54051
157 ->161       0.21161

Excited State  5:      Singlet-A      3.9881 eV  310.88 nm  f=0.0488
<S**2>=0.000
156 ->159      0.62924
157 ->158      0.11696
157 ->159      0.22744

Excited State  6:      Singlet-A      4.0713 eV  304.53 nm  f=0.1345
<S**2>=0.000
155 ->158      -0.18222
156 ->159      -0.10062
156 ->162       0.12730
157 ->160      -0.30461
157 ->161       0.44531
157 ->162      -0.34317

SavETr:  write IOETrn=  770 NScale= 10 NData= 16 NLR=1 NState=  6
LETran=   118.

```

## DFT (PTZTPE-3)

Standard orientation:

| Center<br>Number | Atomic<br>Number | Atomic<br>Type | Coordinates (Angstroms) |           |           |
|------------------|------------------|----------------|-------------------------|-----------|-----------|
|                  |                  |                | X                       | Y         | Z         |
| 1                | 6                | 0              | -3.957636               | -3.998109 | -2.201012 |
| 2                | 1                | 0              | -4.916043               | -4.471256 | -1.980451 |
| 3                | 1                | 0              | -3.178173               | -4.757390 | -2.118554 |
| 4                | 1                | 0              | -3.979498               | -3.628798 | -3.236637 |
| 5                | 7                | 0              | -3.704687               | -2.954079 | -1.217132 |
| 6                | 6                | 0              | -4.768556               | -2.121396 | -0.834958 |
| 7                | 6                | 0              | -2.368324               | -2.528782 | -1.022086 |
| 8                | 6                | 0              | -4.668031               | -1.326188 | 0.326866  |
| 9                | 6                | 0              | -5.963521               | -2.051052 | -1.573753 |
| 10               | 6                | 0              | -2.014623               | -1.797395 | 0.127466  |
| 11               | 6                | 0              | -1.358033               | -2.811991 | -1.952446 |
| 12               | 6                | 0              | -5.712822               | -0.495548 | 0.703477  |
| 13               | 16               | 0              | -3.241990               | -1.489607 | 1.382344  |
| 14               | 6                | 0              | -7.020969               | -1.245265 | -1.171625 |
| 15               | 1                | 0              | -6.071701               | -2.628606 | -2.483687 |
| 16               | 6                | 0              | -0.705972               | -1.367960 | 0.325980  |
| 17               | 6                | 0              | -0.042564               | -2.412120 | -1.727387 |
| 18               | 1                | 0              | -1.590926               | -3.354430 | -2.861019 |
| 19               | 6                | 0              | -6.923818               | -0.438067 | -0.021450 |

|    |   |   |            |           |           |
|----|---|---|------------|-----------|-----------|
| 20 | 1 | 0 | -5.597770  | 0.112735  | 1.596389  |
| 21 | 1 | 0 | -7.919620  | -1.239367 | -1.773901 |
| 22 | 1 | 0 | -0.481079  | -0.770136 | 1.203365  |
| 23 | 6 | 0 | 0.315915   | -1.681631 | -0.586210 |
| 24 | 1 | 0 | 0.718289   | -2.686267 | -2.451070 |
| 25 | 6 | 0 | -7.957243  | 0.448735  | 0.491268  |
| 26 | 6 | 0 | 1.713555   | -1.249899 | -0.347152 |
| 27 | 6 | 0 | -9.190775  | 0.792262  | 0.020102  |
| 28 | 1 | 0 | -7.678391  | 0.939036  | 1.420746  |
| 29 | 6 | 0 | 2.255867   | -1.223106 | 0.949196  |
| 30 | 6 | 0 | 2.547665   | -0.861869 | -1.409531 |
| 31 | 6 | 0 | -10.099929 | 1.711351  | 0.757943  |
| 32 | 6 | 0 | -9.685513  | 0.310708  | -1.235206 |
| 33 | 6 | 0 | 3.570840   | -0.828234 | 1.170955  |
| 34 | 1 | 0 | 1.649696   | -1.546054 | 1.790400  |
| 35 | 6 | 0 | 3.859175   | -0.457022 | -1.186295 |
| 36 | 1 | 0 | 2.156452   | -0.855522 | -2.422499 |
| 37 | 6 | 0 | -11.034849 | 2.498157  | 0.063351  |
| 38 | 6 | 0 | -10.050156 | 1.816372  | 2.159146  |
| 39 | 7 | 0 | -10.120598 | -0.052488 | -2.253457 |
| 40 | 6 | 0 | 4.398766   | -0.420466 | 0.110549  |
| 41 | 1 | 0 | 3.968486   | -0.839257 | 2.181200  |
| 42 | 1 | 0 | 4.476400   | -0.156113 | -2.026162 |
| 43 | 6 | 0 | -11.869546 | 3.381067  | 0.745070  |
| 44 | 1 | 0 | -11.101518 | 2.420249  | -1.017307 |
| 45 | 6 | 0 | -10.882724 | 2.702987  | 2.837311  |
| 46 | 1 | 0 | -9.377536  | 1.179980  | 2.725317  |
| 47 | 6 | 0 | 5.818011   | -0.026787 | 0.357477  |
| 48 | 6 | 0 | -11.794292 | 3.492804  | 2.133917  |
| 49 | 1 | 0 | -12.579789 | 3.984072  | 0.187168  |
| 50 | 1 | 0 | -10.830567 | 2.763966  | 3.920418  |
| 51 | 6 | 0 | 6.377043   | 1.097852  | -0.182051 |
| 52 | 6 | 0 | 6.578537   | -0.961228 | 1.243298  |
| 53 | 1 | 0 | -12.447481 | 4.178807  | 2.664665  |
| 54 | 6 | 0 | 7.849037   | 1.357453  | -0.159445 |
| 55 | 6 | 0 | 5.564374   | 2.166343  | -0.840076 |
| 56 | 6 | 0 | 6.527296   | -2.349612 | 1.027491  |
| 57 | 6 | 0 | 7.313397   | -0.487723 | 2.343238  |
| 58 | 6 | 0 | 8.346141   | 2.614569  | 0.227389  |
| 59 | 6 | 0 | 8.768997   | 0.380217  | -0.575557 |
| 60 | 6 | 0 | 5.950413   | 2.690244  | -2.086512 |
| 61 | 6 | 0 | 4.434004   | 2.715166  | -0.211265 |
| 62 | 6 | 0 | 7.213337   | -3.230390 | 1.861780  |
| 63 | 1 | 0 | 5.947292   | -2.735726 | 0.194604  |
| 64 | 6 | 0 | 7.989799   | -1.369079 | 3.184808  |
| 65 | 1 | 0 | 7.349869   | 0.579389  | 2.535660  |
| 66 | 6 | 0 | 9.715453   | 2.873721  | 0.230074  |
| 67 | 1 | 0 | 7.649398   | 3.389544  | 0.532236  |
| 68 | 6 | 0 | 10.137597  | 0.643125  | -0.584630 |
| 69 | 1 | 0 | 8.402865   | -0.589861 | -0.894805 |



|    |   |   |           |           |           |
|----|---|---|-----------|-----------|-----------|
| 70 | 6 | 0 | 5.212777  | 3.702511  | -2.697599 |
| 71 | 1 | 0 | 6.834241  | 2.294141  | -2.577396 |
| 72 | 6 | 0 | 3.703151  | 3.735947  | -0.816578 |
| 73 | 1 | 0 | 4.132625  | 2.336408  | 0.759746  |
| 74 | 6 | 0 | 7.947767  | -2.743585 | 2.944776  |
| 75 | 1 | 0 | 7.170250  | -4.298533 | 1.668517  |
| 76 | 1 | 0 | 8.547675  | -0.980890 | 4.032209  |
| 77 | 6 | 0 | 10.617704 | 1.888850  | -0.176548 |
| 78 | 1 | 0 | 10.077884 | 3.847986  | 0.545674  |
| 79 | 1 | 0 | 10.829870 | -0.125978 | -0.915193 |
| 80 | 6 | 0 | 4.085664  | 4.230363  | -2.064798 |
| 81 | 1 | 0 | 5.521787  | 4.083331  | -3.666947 |
| 82 | 1 | 0 | 2.835603  | 4.148684  | -0.309642 |
| 83 | 1 | 0 | 8.476507  | -3.429803 | 3.599892  |
| 84 | 1 | 0 | 11.684486 | 2.092776  | -0.182091 |
| 85 | 1 | 0 | 3.514929  | 5.024791  | -2.536760 |

-----  
Rotational constants (GHZ):      0.1113550      0.0152928      0.0145573

### TD-DFT (PTZTPE-3)

Excitation energies and oscillator strengths:

Excited State 1:      Singlet-A      2.7115 eV   457.26 nm   f=0.4812  
<S\*\*2>=0.000  
175 ->177      0.10013  
176 ->177      0.68590

This state for optimization and/or second-order correction.

Total Energy, E(TD-HF/TD-KS) = -2357.21925156

Copying the excited state density for this state as the 1-particle RhoCI density.

Excited State 2:      Singlet-A      3.1830 eV   389.52 nm   f=0.0290  
<S\*\*2>=0.000  
175 ->177      0.68321  
176 ->177      -0.12174

Excited State 3:      Singlet-A      3.3339 eV   371.89 nm   f=0.4743  
<S\*\*2>=0.000  
174 ->177      -0.13548  
175 ->178      -0.11590  
176 ->178      0.67205

Excited State 4:      Singlet-A      3.6352 eV   341.06 nm   f=0.1894  
<S\*\*2>=0.000  
175 ->178      0.68201

Excited State 5:      Singlet-A      3.6717 eV   337.67 nm   f=0.4776  
<S\*\*2>=0.000

|           |          |
|-----------|----------|
| 173 ->177 | 0.26266  |
| 174 ->177 | 0.56519  |
| 176 ->178 | 0.13169  |
| 176 ->179 | 0.17372  |
| 176 ->180 | -0.12219 |
| 176 ->181 | -0.11370 |

Excited State 6: Singlet-A 3.8708 eV 320.30 nm f=0.3414  
<S\*\*2>=0.000

|           |          |
|-----------|----------|
| 174 ->177 | -0.28232 |
| 175 ->180 | -0.11647 |
| 176 ->179 | 0.45123  |
| 176 ->180 | -0.35688 |
| 176 ->181 | -0.11521 |

SavETr: write IOETrn= 770 NScale= 10 NData= 16 NLR=1 NState= 6  
LETran= 118.
